# Supplementary material for: The Association between Ankle–Brachial Index/Pulse Wave Velocity and Cerebral Large and Small Vessel Diseases in Stroke Patients
Source: MDPI journal article supplement (doi:10.3390/diagnostics13081455), 2023-04-18
Supplement: s1 [file s1]

Figure S1: The study flowchart

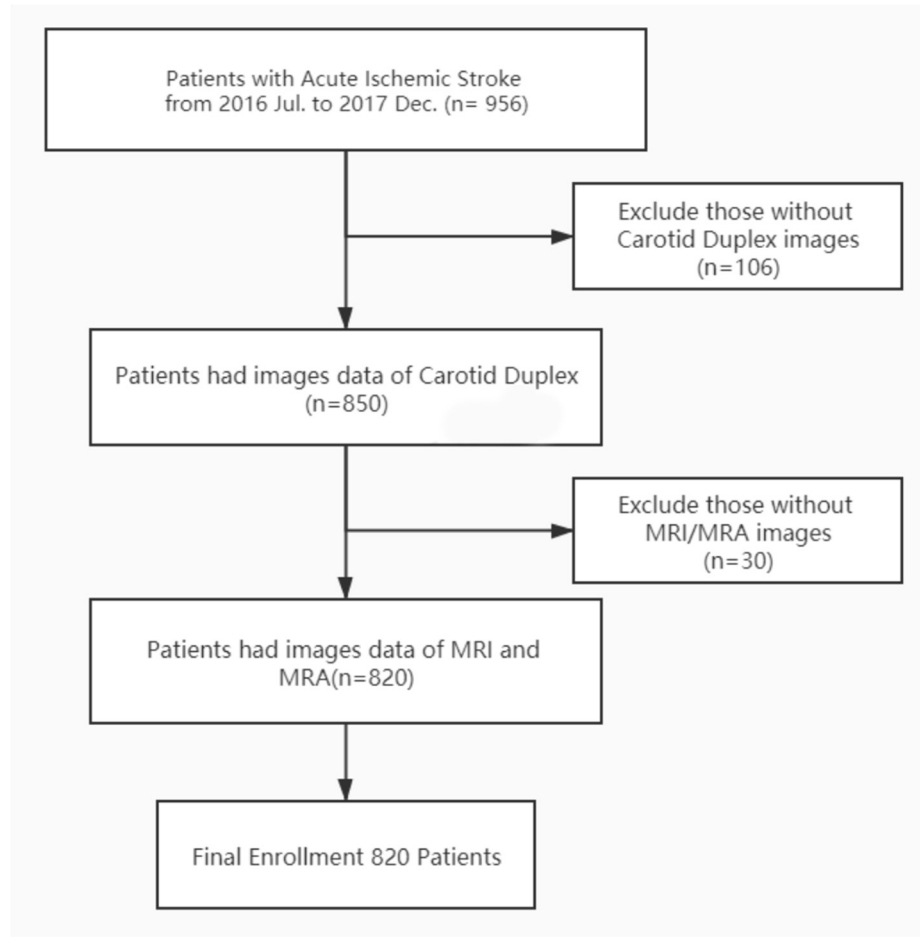

Table S1. Demographic data of enrolled participants

|                                           | N    | n (%) / Median (IQR)    |
|-------------------------------------------|------|-------------------------|
| <b>Characteristic</b>                     |      |                         |
| Age                                       | 820  | 68.00 (59.00, 78.00)    |
| Male                                      | 820  | 501 (61.10)             |
| Body height                               | 819* | 162.00 (155.00, 168.00) |
| Body Weight                               | 819* | 62.00 (55.00, 71.00)    |
| BMI                                       | 819* | 24.03 (21.49, 26.64)    |
| Af                                        | 641* | 91 (14.20)              |
| HTN                                       | 820  | 535 (65.24)             |
| DM                                        | 820  | 319 (38.90)             |
| Hyperlipidemia                            | 820  | 422 (51.46)             |
| Heart disease                             | 820  | 112 (13.66)             |
| Dementia                                  | 795* | 33 (4.15)               |
| <b>Measurement of arterial indicators</b> |      |                         |
| ABI, average                              | 820  | 1.08 (1.01, 1.14)       |
| ABI, minimum                              | 820  | 1.06 (0.97, 1.11)       |
| BaPWV, average                            | 785* | 18.90 (16.10, 21.80)    |
| BaPWV, maximum                            | 785* | 19.50 (16.70, 22.90)    |
| <b>Cerebral neuroimaging markers</b>      |      |                         |
| Any Extracranial stenosis                 | 820  | 743 (90.61)             |
| Total Extracranial stenosis grade         | 820  | 5.00 (4.00, 6.00)       |
| Any Intracranial stenosis                 | 820  | 551 (67.20)             |

|                                   |     |                     |
|-----------------------------------|-----|---------------------|
| Total Intracranial stenosis grade | 820 | 11.00 (9.00, 14.00) |
| Any Presence of SVD               | 820 | 492 (60.00)         |
| Total SVD scores                  | 820 |                     |
| 0                                 |     | 328 (40.00)         |
| 1                                 |     | 157 (19.15)         |
| 2                                 |     | 169 (20.61)         |
| 3                                 |     | 100 (12.20)         |
| 4                                 |     | 66 (8.05)           |

\*Some patient's data was missing from the medical records or not to be checked during hospitalization

ABI: Ankle-brachial index; BMI: body mass index; baPWV: brachial-ankle pulse wave velocity; HTN: hypertension; DM: diabetes mellitus; Af: atrial fibrillation; SVD: small vessel disease

\* Average ABI/baPWV indicated the average of bilateral ABI/baPWV values; minimum ABI indicated the lowest data of ABI measured on bilateral sides; maximal baPWV indicated the highest data of baPWV measured on both sides.

Table S2. ABI and CSVD score sub-items

|                             | N   | ABI, average<br>Median (IQR) | P value <sup>a</sup> | ABI, minimum<br>Median (IQR) | P value <sup>a</sup> |
|-----------------------------|-----|------------------------------|----------------------|------------------------------|----------------------|
| Lacunes                     |     |                              |                      |                              |                      |
| Absence (Score 0)           | 476 | 1.09 (1.03, 1.14)            | <0.001               | 1.07 (1.00, 1.12)            | <0.001               |
| Presence(Score 1)           | 344 | 1.07 (0.98, 1.12)            |                      | 1.04 (0.93, 1.10)            |                      |
| Microbleeds                 |     |                              |                      |                              |                      |
| Absence (Score 0)           | 585 | 1.08 (1.02, 1.14)            | 0.233                | 1.06 (0.98, 1.11)            | 0.158                |
| Presence(Score 1)           | 235 | 1.08 (0.99, 1.13)            |                      | 1.05 (0.96, 1.11)            |                      |
| Perivascular spaces         |     |                              |                      |                              |                      |
| Absence to Mild (Score 0)   | 537 | 1.09 (1.03, 1.14)            | <0.001               | 1.07 (1.00, 1.12)            | <0.001               |
| Moderate to Severe(Score 1) | 283 | 1.06 (0.98, 1.13)            |                      | 1.03 (0.92, 1.10)            |                      |
| White matter intensities    |     |                              |                      |                              |                      |
| Absence to Mild (Score 0)   | 623 | 1.09 (1.03, 1.14)            | <0.001               | 1.07 (0.99, 1.12)            | <0.001               |
| Moderate to Severe(Score 1) | 197 | 1.05 (0.94, 1.12)            |                      | 1.02 (0.88, 1.08)            |                      |

<sup>a</sup> Mann-Whitney U test.

\* Average ABI indicated the average of bilateral ABI values; minimum ABI indicated the lowest data of ABI measured on bilateral sides.

ABI: Ankle-brachial index

Table S3. BaPWV and CSVD score sub-items

|                             | N   | BaPWV, average<br>Median (IQR) | P value <sup>a</sup> | BaPWV, maximum<br>Median (IQR) | P value <sup>a</sup> |
|-----------------------------|-----|--------------------------------|----------------------|--------------------------------|----------------------|
| Lacunes                     |     |                                |                      |                                |                      |
| Absence (Score 0)           | 456 | 18.30 (15.55, 21.30)           | <0.001               | 18.80 (16.20, 22.05)           | <0.001               |
| Presence(Score 1)           | 329 | 19.70 (17.10, 22.60)           |                      | 20.40 (17.80, 23.60)           |                      |
| Microbleeds                 |     |                                |                      |                                |                      |
| Absence (Score 0)           | 566 | 18.70 (15.95, 21.60)           | 0.030                | 19.20 (16.50, 22.50)           | 0.006                |
| Presence(Score 1)           | 219 | 19.40 (16.65, 22.30)           |                      | 20.20 (17.40, 23.50)           |                      |
| Perivascular spaces         |     |                                |                      |                                |                      |
| Absence to Mild (Score 0)   | 521 | 18.30 (15.65, 21.30)           | <0.001               | 18.90 (16.30, 22.10)           | <0.001               |
| Moderate to Severe(Score 1) | 264 | 20.00 (17.38, 22.98)           |                      | 20.70 (18.00, 24.00)           |                      |
| White matter intensities    |     |                                |                      |                                |                      |
| Absence to Mild (Score 0)   | 602 | 18.40 (15.80, 21.35)           | <0.001               | 19.00 (16.40, 22.20)           | <0.001               |
| Moderate to Severe(Score 1) | 183 | 20.80 (17.70, 23.00)           |                      | 21.40 (18.30, 24.30)           |                      |

<sup>a</sup> Mann-Whitney U test.

\* Average baPWV indicated the average of bilateral baPWV values; maximum baPWV indicated the highest data of baPWV measured on bilateral sides.

BaPWV: brachial-ankle pulse wave velocity
